1 **Patterning of the vertebrate head in time and space by BMP signalling**

2 <sup>1,2</sup>Kongju Zhu, <sup>1</sup>Herman P. Spaink, <sup>1</sup>Antony J. Durston\*

3

4 <sup>1</sup>Institute of Biology, Leiden University, Sylviusweg 72, 2333BE, Leiden, The Netherlands

5 <sup>2</sup>Department of Pathology, Brigham and Women's Hospital / Harvard Medical School,

6 Boston, MA 02115, United States

7 \*Correspondance: [a.j.durston@gmail.com](mailto:a.j.durston@gmail.com)

8

9

10

11

12

13

14

15

16

17

18

19

20

21

22

23

24

25

26

27 **Abstract**

28

29 How head patterning is regulated in vertebrates is yet to be understood. In this study, we  
30 show that frog embryos injected with Noggin at different blastula and gastrula stages had  
31 their head development sequentially arrested at different positions. When timed BMP  
32 inhibition was applied to BMP-overexpressing embryos, the expression of five genes: *xcg-1*  
33 (a marker of the cement gland, which is the front-most structure in the frog embryo), *six3* (a  
34 forebrain marker), *otx2* (a forebrain and mid-brain marker), *gbx2* (an anterior hindbrain  
35 marker) and *hoxd1* (a posterior hindbrain marker) were sequentially fixed. These results  
36 suggest that timed interactions between BMP and anti-BMP are involved in patterning the  
37 vertebrate head progressively in time and space. Since the above genes are not expressed  
38 sequentially, there may be a BMP dependent gene sequence during head patterning that can  
39 be arrested by BMP inhibition and regulate the specification of positional values in the head.

40

41

42

43

44

45

46

47

48

49

50

51

52

53 **Introduction**

54

55 During early development, the vertebrate embryo is patterned from anterior to posterior in a  
56 temporally progressive manner (Nieuwkoop 1952; Eyal-Giladi 1954; Gamse & Sive 2000;  
57 Gamse & Sive 2001; Stern *et al.* 2006): anterior tissues are specified early, and more  
58 posterior tissues are determined progressively later. Whereas coordination between temporal  
59 and spatial control of anterior-posterior (A-P) patterning is evident, a thorough understanding  
60 of the underlying mechanisms is still lacking in vertebrates.

61

62 In frog, there is evidence for a BMP/anti-BMP dependent time-space translation mechanism  
63 that regulates trunk-tail patterning by *Hox* genes (Wacker *et al.* 2004a; Durston & Zhu 2015).  
64 In this mechanism, *Hox* genes are sequentially activated in a high BMP region of the  
65 mesoderm (non-organiser mesoderm) (Wacker *et al.* 2004b), where their expression is  
66 dynamic and unstable. As the mesoderm involutes during gastrulation, *Hox* expressing cells  
67 are successively exposed to signals from the Spemann organiser, resulting in the *Hox*  
68 sequence being fixed at different points along the forming axis. In this way, the timing  
69 information encoded by *Hox* genes is translated into a spatial pattern. The putative organiser  
70 signals that stabilise *Hox* codes are BMP antagonists, e.g. Noggin (Smith & Harland 1992)  
71 and Chordin (Sasai *et al.* 1994), because these mimic the function of the organiser in  
72 dorsalising the embryo (Smith *et al.* 1993; Khokha *et al.* 2005), inducing secondary axes  
73 (Spemann & Mangold 1924; Sasai *et al.* 1994; Fang *et al.* 2000), and rescuing A-P axes in  
74 ventralised embryos (Sasai *et al.* 1994; Wacker *et al.* 2004a). Notably, timed Noggin  
75 treatments in ventralised embryos not only rescue the A-P axis, but also the spatial pattern of

76 *Hox* gene expression (Wacker *et al.* 2004a). This conclusion is further supported by a recent  
77 study in chick, which reported the fixation of *Hox* codes in explanted posterior primitive  
78 streak (containing high BMP mesoderm) by Noggin treatments (Dias *et al.* 2014). Together,  
79 these findings suggest that BMP signalling is involved in patterning the trunk-tail part of the  
80 axis by (directly or indirectly) regulating *Hox* gene expression.

81

82 In the rescue experiments mentioned above (Sasai *et al.* 1994; Wacker *et al.* 2004a), Noggin  
83 and Chordin treatments can also rescue the head part of the axis, suggesting that BMP  
84 signalling may also be involved in patterning the head. Using heat-shock inducible *chordin*  
85 transgene lines (Tg (*hsp70:chd*)), Hashiguchi *et al.* have shown in zebrafish that the  
86 expression of *six3* (a forebrain marker) (Kobayashi *et al.* 1998), *otx2* (a forebrain and mid-  
87 brain marker) (Li *et al.* 1994; Mori *et al.* 1994), *gbx1* (the counterpart of *Xenopus gbx2*; a  
88 rostral hindbrain marker) (Rhinn *et al.* 2003), and *hoxb1b* (a caudal hindbrain marker)  
89 (Alexandre *et al.* 1996) are sequentially induced by timed anti-BMP treatment from mid-  
90 blastula to early gastrula stages (Hashiguchi & Mullins 2013). This is consistent with the  
91 observations that timed Noggin injections in ventralised embryos rescued different portions  
92 of the A-P axis in frog (Wacker *et al.* 2004a), and that progressively later anti-BMP (Chordin)  
93 treatments resulted in progressively more posterior axis defects in zebrafish (Tucker *et al.*  
94 2008). These findings raise an interesting question: is BMP signalling involved in  
95 progressively patterning the head (brain) region of the embryo?

96

97 In deuterostomes, the front-most portion of the A-P axis is not the head, but the extreme  
98 anterior domain (EAD), a region wherein ectoderm and endoderm directly juxtapose in the  
99 early embryo (Jacox *et al.* 2014). In frog, this region gives rise to three organs, the cement  
100 gland (CG), the primary mouth, and the anterior pituitary gland (Dickinson & Sive 2007).

101 Among them, the cement gland is an ectodermal organ that lies anterior to any neural tissue  
102 (Sive *et al.* 1989). The formation of CG can be affected by perturbations of the development  
103 of dorsal mesoderm (the Spemann organiser) (Scharf & Gerhart 1983; Kao & Elinson 1988),  
104 suggesting a requirement for organiser signals in the formation of this anterior-most structure.  
105 It would therefore be interesting to see if CG formation is also regulated by BMP signalling.

106

107 To test the role of BMP signalling in head patterning, we did timed anti-BMP treatments in  
108 both wild-type (WT) and ventralised frog embryos. This resulted in sequential arrest (in WT  
109 embryos) or rescue (in ventralised embryos) of head and EAD patterning at different values,  
110 suggesting that a timing mechanism, which is BMP dependent and can be converted into  
111 spatial patterns by anti-BMP signals, may be involved in patterning the vertebrate head-EAD.

112

## 113 **Results and discussion**

114

### 115 **Timed anti-BMP treatment arrests head patterning at different positions**

116 To examine the role of BMP signalling in head formation, we injected Noggin protein, an  
117 antagonist of BMP (Smith & Harland 1992; Zimmerman *et al.* 1996), into the blastocoel of  
118 the embryo at stage 8, 9, 10, 10.5 and 11 (from blastula to gastrula stage) (Fig 1). Embryos  
119 injected with Noggin at stage 8 formed a ball of tissue with a large cement gland. Embryos  
120 injected at stage 9 also showed a blob of tissue, but the cement gland was much smaller.  
121 When Noggin was injected at st.10, a visible, short head (half head) was formed in the  
122 embryo. Injection of Noggin at st.10.5 and 11 resulted in the formation of more posterior  
123 structures, truncating head formation at the hindbrain and neck region, respectively.  
124 Therefore, sequentially later Noggin treatments arrested head and EAD formation at more  
125 and more posterior positions, suggesting that the EAD and head are patterned gradually in a

126 timed fashion. In zebrafish, sequential BMP inhibition results in axial defects at progressively  
127 more posterior positions: later anti-BMP treatment affects posterior positions but not anterior  
128 positions (Tucker *et al.* 2008). Together, these results suggest that the process involved in  
129 head-tail patterning can be stopped sequentially by timed BMP inhibition.

130

131 **Timed anti-BMP treatment in ventralised embryos rescued different portions of the**  
132 **head**

133 The above observations led us to postulate that the “head timer” is BMP-dependent and can  
134 be sequentially fixed by BMP inhibition, resulting in positional values being sequentially  
135 specified. To test this, we did timed anti-BMP treatment in ventralised frog embryos (high  
136 BMP) (Fig. 2).

137

138 In *Xenopus*, ventralisation can be achieved by *BMP* overexpression (Dale *et al.* 1992; Jones  
139 *et al.* 1992; Clement *et al.* 1995; Schmidt *et al.* 1995), while dorsalisation can be achieved by  
140 BMP inhibition (Smith *et al.* 1993; Zhu *et al.* 2017). In our experiments, injection of the frog  
141 embryo with 2ng *bmp4* resulted in complete ventralisation, showing a blob of tissue that had  
142 no axis (Fig S1). When the embryo was injected with the same amount of *smad6*, an  
143 inhibitory Smad that can interfere with BMP pathway (Imamura *et al.* 1997; Hata *et al.* 1998;  
144 Goto *et al.* 2007), however, it displayed a dorsalised phenotype (Fig S1). We then did anti-  
145 BMP treatments in BMP4-ventralised embryos at different stages using a Smad6GR  
146 construct (Marom *et al.* 2005). Timed activation of this GR construct with dexamethazone  
147 induced timed BMP pathway inhibition by *smad6* activation. Timed Smad6 treatment fixed  
148 five anterior markers sequentially: it strongly fixed *xcg-1* at stage 8, *six3* at stage 8 and 9,  
149 *otx2* at stage 9 and 10, *gbx2* at stage 10 and 10.5, and *hoxd1* at stage 10.5 (Fig. 3). The

150 sequential fixation of these genes fits well with the timing observed in Fig 1, suggesting that  
151 the head-EAD is progressively patterned by timed BMP/anti-BMP actions.

152

153 It is worth noting that, both in Hashiguchi's study and in this study, the last and most  
154 posterior component of the head gene sequence is *hox1: hoxb1* and *hoxd1*, respectively. Since  
155 *hox1* is the earliest, most anterior component of a previously elucidated *Hox* time-space  
156 sequence, the spatial arrangement of these early induced head genes is clearly complementary  
157 to and continuous with the later, more posterior *Hox* gene sequence. It is also clearly  
158 continuous with a yet earlier, more anterior EAD sequence. In short, a BMP-anti BMP time-  
159 space sequence covers the whole A-P axis.

160

#### 161 **The timing of A-P markers is disrupted in *smad6*-injected embryos**

162 During trunk patterning, collinearity causes *Hox* genes to be expressed in a 3' to 5' order, and  
163 that more 3' genes are expressed earlier and more anteriorly than/to more 5' ones (Lewis  
164 1978; Duboule & Dolle 1989; Graham *et al.* 1989). The temporally collinear expression of  
165 *Hox* genes has been proposed to serve as a timer, which can be interpreted and translated into  
166 spatial information (Wacker *et al.* 2004a). Since the anterior genes are sequentially fixed  
167 earlier than *Hox* genes by anti-BMP treatment, it is natural to think that these genes are also  
168 expressed in a temporal sequence, which could complement the *Hox* sequence to constitute  
169 an integrative timer. In addition, the very early induction of *xcg1*, Fig. 2 indicates that the  
170 EAD is timed very early in the same sequence as the head. However, although these genes  
171 showed a spatial sequence of expression along the A-P axis (Fig S2), the endogenous timed  
172 activation of these genes did not strictly correspond to their spatial order along the A-P axis  
173 (Fig 3). For example, *six-3* demarcates the most anterior border of the developing neural plate  
174 (Oliver *et al.* 1995), but it was expressed at the end of gastrulation, much later than the other

175 genes. The expression domain of *gbx2* is anterior to that of *hoxd1*, but it was also not  
176 expressed earlier than *hoxd1*. Moreover, unlike Hox genes, which are expressed in ventral  
177 and lateral mesoderm during gastrulation, the earliest expression of *six3* and *otx2* was located  
178 at the dorsal side of the embryo. The expression kinetics and expression locations of these  
179 genes therefore make them less likely to be “timer genes” or “fixation genes” themselves (at  
180 least not all of them are). They are presumably downstream of the timer. Even so, however,  
181 their timing was disrupted by *smad6* injection (injection at 2-cell or 4-cell stage, *Smd6*  
182 remaining available till much later) (Fig 3). For example, the expression of *six3* in *smad6*-  
183 injected embryos was advanced to stage 11.5 from stage 12. Expression of *gbx2* and *hoxd1*  
184 was significantly reduced and only detectable from stage 11.5, whereas their expression in  
185 WT embryos was observed earlier (at stage 10.5). These results are unsurprising. The anterior  
186 *six3* would be induced (evidently prematurely) by this early BMP inhibition. *gbx2* and *hoxd1*  
187 would be inhibited and are evidently delayed because the axial time and position has been  
188 fixed at early/anterior by this early anti-BMP treatment. Although these anterior genes may  
189 only serve as positional markers, the time of their expression is also of crucial importance.  
190 For example, *gbx2* shows a significant effect on head development when ectopically  
191 expressed at stage 9 and 10. The effect gets less drastic when it is expressed at later stages,  
192 e.g. stage 12 and 13 (Tour *et al.* 2002). Therefore, these results further emphasise the  
193 importance of BMP signalling in regulating head patterning.

194

### 195 **Hypothesis for head patterning by BMP signalling**

196

197 The results in this study suggest two aspects of head patterning. First, the vertebrate head and  
198 EAD are patterned in a temporally progressive manner: the EAD is patterned first, followed  
199 by the patterning of the forebrain, the midbrain, the hindbrain and the neck. Second, BMP



200 signalling is involved in patterning the head in time and space, which can be seen from the  
201 progressive arrest of head and EAD formation by timed anti-BMP treatments (Fig 1) and  
202 from sequential fixation of anterior marker genes (*xcg-1*, *six3*, *otx2*, *gbx2*, and *hoxd1*) by anti-  
203 BMP (Fig 2). However, the molecular mechanism, by which BMP signalling regulates head-  
204 EAD patterning, is not yet clear. It is likely a similar mechanism to that which patterns the  
205 trunk-tail part of the axis is involved (Wacker *et al.* 2004a; Durston & Zhu 2015) (Fig 4). A  
206 key component of this mechanism is a BMP dependent timer, which is temporal gene  
207 sequence. The existence of such a timer has been demonstrated in gastrula NOM mesoderm  
208 for the *Xenopus Hox* sequence. During trunk-tail patterning, the timer is likely to be regulated  
209 by *Hox* genes (Wacker *et al.* 2004a; Durston & Zhu 2015). The timer genes involved in head-  
210 EAD patterning and the location of the timer, however, are so far unknown. Some of the  
211 anterior head makers (e.g. *six3*, *gbx2*) that we examined in our study presumably do not  
212 regulate timing or fixation because they were not sequentially expressed endogenously (Fig  
213 3). Since these genes could be fixed sequentially by anti-BMP treatments, a possible  
214 explanation is that sequential states of the currently unknown “head timer” are fixed  
215 sequentially by anti-BMP signals and these then regulate the expression of anterior marker  
216 genes and hence progressive patterning of the head-EAD. In conclusion, the results in study  
217 argue for a vital role for BMP/anti-BMP in patterning the vertebrate head in time and space.  
218 We postulate that a ventral BMP dependent timer sequentially exposes and dorsal anti BMP  
219 sequentially fixes an early-anterior to late-posterior sequence of A-P states, starting in the  
220 most anterior EAD part of the axis and then going on to an A-P sequence of states in the head  
221 before ending in an A-P *Hox* sequence in the trunk and tail part of the axis (Fig 4).

222

## 223 **Experimental procedures**

224

## 225 **Microinjection**

226 Frog embryos were harvested from naturally mated females and staged according to  
227 Nieuwkoop and Faber (Nieuwkoop & Faber 1994). For timed anti-BMP treatment in wild-  
228 type embryos, 200nL 0.1µg/µL human noggin protein (Sigma H6416) was injected into the  
229 blastocoel of embryos at stage 8, 9,10, 10.5 and 11. The embryos were then cultured to stage  
230 28 for taking pictures. A similar approach has been used by others (Cooke & Smith 1989;  
231 Wacker *et al.* 2004a). mRNA for injection was transcribed with mMessage mMachine Kit  
232 (Ambion, Life technologies, AM1340) from the following plasmids after linearization at the  
233 appropriate restriction sites: pSP64T-BMP4 (for *BMP4* RNA) (Nishimatsu *et al.* 1992) and  
234 pCS2-hSmad6GR (for *smad6GR* RNA) (Marom *et al.* 2005). To induce full ventralisation,  
235 about 2ng *BMP4* RNA was injected to each embryo at 2-cell or 4-cell stage and cultured to  
236 stage 26. Timed anti-BMP treatment in BMP-ventralised embryos was achieved by combined  
237 injection of 2ng *BMP4* RNA and 2ng *smad6GR* RNA at 2-cell or 4-cell stage. The embryos  
238 were then treated with 10 µM dexamethasone for 2 hours at desired stages and cultured to  
239 stage 26.

240

## 241 **Whole mount in situ hybridization**

242 When reached desired stages, embryos were fixed overnight in MEMFA at 4°C. After  
243 dehydration in 100% methanol, they were stored in methanol at -20°C until use. Whole  
244 mount in situ hybridization (WISH) was performed as previously described (Wacker *et al.*,  
245 2004a). The probes for in situ hybridization were synthesized from the following plasmids  
246 after linearization: pVZ1-xcg1 (for *xcg-1* probe) (Gammill & Sive 2000), pBSSK-Six3 (for  
247 *six3* probe) (Kenyon *et al.* 1999), pBluescript-KS-xotx2 (for *otx2* probe) (Blitz & Cho 1995),  
248 pXgbx-2 (for *gbx-2* probe) (von Bubnoff *et al.* 1996), and pBluescript SK-xHoxLab1 (for  
249 *hoxd1* probe) (Sive & Cheng 1991).

250

## 251 **Acknowledgements**

252 We thank Dr A Fainsod for generously providing us with the *smad6GR* construct; Dr H Sive  
253 for the *xcg-1* probe and the *hoxd-1* probe; Drs S Moody, M Zuber, G Barsacchi and M  
254 Andreazzoli for the *six-3* probe; Dr K Cho for the *otx-2* probe; and Dr D Kimelman for the  
255 *gbx-2* probe.

256

## 257 **References**

258

259 Alexandre, D., Clarke, J.D., Oxtoby, E., Yan, Y.L., Jowett, T. & Holder, N. (1996) Ectopic  
260 expression of Hoxa-1 in the zebrafish alters the fate of the mandibular arch neural crest and  
261 phenocopies a retinoic acid-induced phenotype. *Development* **122**, 735-746.

262 Blitz, I.L. & Cho, K.W.Y. (1995) Anterior Neurectoderm Is Progressively Induced during  
263 Gastrulation - the Role of the Xenopus Homeobox Gene Orthodenticle. *Development* **121**,  
264 993-1004.

265 Clement, J.H., Fettes, P., Knochel, S., Lef, J. & Knochel, W. (1995) Bone Morphogenetic  
266 Protein-2 in the Early Development of Xenopus-Laevis. *Mech Develop* **52**, 357-370.

267 Cooke, J. & Smith, J.C. (1989) Gastrulation and larval pattern in Xenopus after blastocoelic  
268 injection of a Xenopus-derived inducing factor: experiments testing models for the normal  
269 organization of mesoderm. *Dev Biol* **131**, 383-400.

270 Dale, L., Howes, G., Price, B.M. & Smith, J.C. (1992) Bone morphogenetic protein 4: a  
271 ventralizing factor in early Xenopus development. *Development* **115**, 573-585.

272 Dias, A.S., de Almeida, I., Belmonte, J.M., Glazier, J.A. & Stern, C.D. (2014) Somites  
273 Without a Clock. *Science* **343**, 791-795.

- 274 Dickinson, A. & Sive, H. (2007) Positioning the extreme anterior in *Xenopus*: cement gland,  
275 primary mouth and anterior pituitary. *Semin Cell Dev Biol* **18**, 525-533.
- 276 Duboule, D. & Dolle, P. (1989) The Structural and Functional-Organization of the Murine  
277 Hox Gene Family Resembles That of *Drosophila* Homeotic Genes. *Embo J* **8**, 1497-1505.
- 278 Durston, A.J. & Zhu, K. (2015) A time space translation hypothesis for vertebrate axial  
279 patterning. *Semin Cell Dev Biol* **42**, 86-93.
- 280 Eyal-Giladi, H. (1954) Dynamic aspects of neural induction in amphibia. *Arch Biol (Liege)*  
281 **65**, 179-259.
- 282 Fang, H., Marikawa, Y. & Elinson, R.P. (2000) Ectopic expression of *Xenopus* noggin RNA  
283 induces complete secondary body axes in embryos of the direct developing frog  
284 *Eleutherodactylus coqui*. *Dev Genes Evol* **210**, 21-27.
- 285 Gammill, L.S. & Sive, H. (2000) Coincidence of *otx2* and BMP4 signaling correlates with  
286 *Xenopus* cement gland formation. *Mech Dev* **92**, 217-226.
- 287 Gamse, J. & Sive, H. (2000) Vertebrate anteroposterior patterning: the *Xenopus*  
288 neurectoderm as a paradigm. *Bioessays* **22**, 976-986.
- 289 Gamse, J.T. & Sive, H. (2001) Early anteroposterior division of the presumptive  
290 neurectoderm in *Xenopus*. *Mech Dev* **104**, 21-36.
- 291 Goto, K., Kamiya, Y., Imamura, T., Miyazono, K. & Miyazawa, K. (2007) Selective  
292 inhibitory effects of Smad6 on bone morphogenetic protein type I receptors. *J Biol Chem*  
293 **282**, 20603-20611.
- 294 Graham, A., Papalopulu, N. & Krumlauf, R. (1989) The Murine and *Drosophila* Homeobox  
295 Gene Complexes Have Common Features of Organization and Expression. *Cell* **57**, 367-378.
- 296 Hashiguchi, M. & Mullins, M.C. (2013) Anteroposterior and dorsoventral patterning are  
297 coordinated by an identical patterning clock. *Development* **140**, 1970-1980.

298 Hata, A., Lagna, G., Massague, J. & Hemmati-Brivanlou, A. (1998) Smad6 inhibits  
299 BMP/Smad1 signaling by specifically competing with the Smad4 tumor suppressor. *Genes*  
300 *Dev* **12**, 186-197.

301 Imamura, T., Takase, M., Nishihara, A., Oeda, E., Hanai, J., Kawabata, M. & Miyazono, K.  
302 (1997) Smad6 inhibits signalling by the TGF-beta superfamily. *Nature* **389**, 622-626.

303 Jacox, L., Sindelka, R., Chen, J., Rothman, A., Dickinson, A. & Sive, H. (2014) The extreme  
304 anterior domain is an essential craniofacial organizer acting through Kinin-Kallikrein  
305 signaling. *Cell reports* **8**, 596-609.

306 Jones, C.M., Lyons, K.M., Lapan, P.M., Wright, C.V.E. & Hogan, B.L.M. (1992) Dvr-4  
307 (Bone Morphogenetic Protein-4) as a Posterior-Ventralizing Factor in Xenopus Mesoderm  
308 Induction. *Development* **115**, 639-647.

309 Kao, K.R. & Elinson, R.P. (1988) The entire mesodermal mantle behaves as Spemann's  
310 organizer in dorsoanterior enhanced Xenopus laevis embryos. *Developmental biology* **127**,  
311 64-77.

312 Kenyon, K.L., Moody, S.A. & Jamrich, M. (1999) A novel fork head gene mediates early  
313 steps during Xenopus lens formation. *Development* **126**, 5107-5116.

314 Khokha, M.K., Yeh, J., Grammer, T.C. & Harland, R.M. (2005) Depletion of three BMP  
315 antagonists from Spemann's organizer leads to a catastrophic loss of dorsal structures.  
316 *Developmental cell* **8**, 401-411.

317 Kobayashi, M., Toyama, R., Takeda, H., Dawid, I.B. & Kawakami, K. (1998)  
318 Overexpression of the forebrain-specific homeobox gene six3 induces rostral forebrain  
319 enlargement in zebrafish. *Development* **125**, 2973-2982.

320 Lewis, E.B. (1978) A gene complex controlling segmentation in Drosophila. *Nature* **276**,  
321 565-570.

- 322 Li, Y., Allende, M.L., Finkelstein, R. & Weinberg, E.S. (1994) Expression of two zebrafish  
323 orthodenticle-related genes in the embryonic brain. *Mech Dev* **48**, 229-244.
- 324 Marom, K., Levy, V., Pillemer, G. & Fainsod, A. (2005) Temporal analysis of the early BMP  
325 functions identifies distinct anti-organizer and mesoderm patterning phases. *Dev Biol* **282**,  
326 442-454.
- 327 Mori, H., Miyazaki, Y., Morita, T., Nitta, H. & Mishina, M. (1994) Different spatio-temporal  
328 expressions of three otx homeoprotein transcripts during zebrafish embryogenesis. *Brain Res*  
329 *Mol Brain Res* **27**, 221-231.
- 330 Nieuwkoop, P.D. (1952) Activation and organization of the central nervous system in  
331 amphibians. Part III. Synthesis of a new working hypothesis. *Journal of Experimental*  
332 *Zoology* **120**, 83-108.
- 333 Nieuwkoop, P.D. & Faber, J. (1994) Normal table of *Xenopus laevis* (Daudin) : a  
334 systematical and chronological survey of the development from the fertilized egg till the end  
335 of metamorphosis, New York, Garland Pub.
- 336 Nishimatsu, S., Suzuki, A., Shoda, A., Murakami, K. & Ueno, N. (1992) Genes for bone  
337 morphogenetic proteins are differentially transcribed in early amphibian embryos. *Biochem*  
338 *Biophys Res Commun* **186**, 1487-1495.
- 339 Oliver, G., Mailhos, A., Wehr, R., Copeland, N.G., Jenkins, N.A. & Gruss, P. (1995) Six3, a  
340 murine homologue of the sine oculis gene, demarcates the most anterior border of the  
341 developing neural plate and is expressed during eye development. *Development* **121**, 4045-  
342 4055.
- 343 Rhinn, M., Lun, K., Amores, A., Yan, Y.L., Postlethwait, J.H. & Brand, M. (2003) Cloning,  
344 expression and relationship of zebrafish gbx1 and gbx2 genes to Fgf signaling. *Mech Dev*  
345 **120**, 919-936.

- 346 Sasai, Y., Lu, B., Steinbeisser, H., Geissert, D., Gont, L.K. & De Robertis, E.M. (1994)  
347 *Xenopus* chordin: a novel dorsalizing factor activated by organizer-specific homeobox genes.  
348 *Cell* **79**, 779-790.
- 349 Scharf, S.R. & Gerhart, J.C. (1983) Axis determination in eggs of *Xenopus laevis*: a critical  
350 period before first cleavage, identified by the common effects of cold, pressure and  
351 ultraviolet irradiation. *Dev Biol* **99**, 75-87.
- 352 Schmidt, J.E., Suzuki, A., Ueno, N. & Kimelman, D. (1995) Localized BMP-4 mediates  
353 dorsal/ventral patterning in the early *Xenopus* embryo. *Dev Biol* **169**, 37-50.
- 354 Sive, H.L. & Cheng, P.F. (1991) Retinoic acid perturbs the expression of *Xhox*.lab genes and  
355 alters mesodermal determination in *Xenopus laevis*. *Genes Dev* **5**, 1321-1332.
- 356 Sive, H.L., Hattori, K. & Weintraub, H. (1989) Progressive determination during formation  
357 of the anteroposterior axis in *Xenopus laevis*. *Cell* **58**, 171-180.
- 358 Smith, W.C. & Harland, R.M. (1992) Expression cloning of *noggin*, a new dorsalizing factor  
359 localized to the Spemann organizer in *Xenopus* embryos. *Cell* **70**, 829-840.
- 360 Smith, W.C., Knecht, A.K., Wu, M. & Harland, R.M. (1993) Secreted *noggin* protein mimics  
361 the Spemann organizer in dorsalizing *Xenopus* mesoderm. *Nature* **361**, 547-549.
- 362 Spemann, H. & Mangold, H. (1924) Über induktion von Embryonalagen durch Implantation  
363 Artfremder Organisatoren. *Roux's Arch. f. Entw. Mech.* **100**, 599-638.
- 364 Stern, C.D., Charite, J., Deschamps, J., Duboule, D., Durston, A.J., Kmita, M., Nicolas, J.F.,  
365 Palmeirim, I., Smith, J.C. & Wolpert, L. (2006) Head-tail patterning of the vertebrate  
366 embryo: one, two or many unresolved problems? *Int J Dev Biol* **50**, 3-15.
- 367 Tour, E., Pillemer, G., Gruenbaum, Y. & Fainsod, A. (2002) *Gbx2* interacts with *Otx2* and  
368 patterns the anterior-posterior axis during gastrulation in *Xenopus*. *Mech Dev* **112**, 141-151.

369 Tucker, J.A., Mintzer, K.A. & Mullins, M.C. (2008) The BMP signaling gradient patterns  
370 dorsoventral tissues in a temporally progressive manner along the anteroposterior axis. *Dev*  
371 *Cell* **14**, 108-119.

372 von Bubnoff, A., Schmidt, J.E. & Kimelman, D. (1996) The *Xenopus laevis* homeobox gene  
373 *Xgbx-2* is an early marker of anteroposterior patterning in the ectoderm. *Mech Develop* **54**,  
374 149-160.

375 Wacker, S.A., Jansen, H.J., McNulty, C.L., Houtzager, E. & Durston, A.J. (2004a) Timed  
376 interactions between the Hox expressing non-organiser mesoderm and the Spemann organiser  
377 generate positional information during vertebrate gastrulation. *Dev Biol* **268**, 207-219.

378 Wacker, S.A., McNulty, C.L. & Durston, A.J. (2004b) The initiation of Hox gene expression  
379 in *Xenopus laevis* is controlled by Brachyury and BMP-4. *Dev Biol* **266**, 123-137.

380 Zhu, K., Spaink, H.P. & Durston, A.J. (2017) Collinear Hox-Hox interactions are involved in  
381 patterning the vertebrate anteroposterior (A-P) axis. *Plos One* **12**, e0175287.

382 Zimmerman, L.B., De Jesus-Escobar, J.M. & Harland, R.M. (1996) The Spemann organizer  
383 signal noggin binds and inactivates bone morphogenetic protein 4. *Cell* **86**, 599-606.

384

385

386

387

## 388 **Figure Legends**

389

390 **Fig 1. Timed Noggin-injection in WE embryos resulted in progressive arrest of head**  
391 **patterning.** 200nl 1ng/ $\mu$ L noggin was injected into the blastocoel of the embryo at different  
392 stages. Anterior is to the left and dorsal is up. Black arrows point to the position of the  
393 cement gland.



394

395 **Fig 2. Timed anti-BMP treatment in ventralised embryos led to sequential fixation of**  
396 **anterior genes.** The expression of *xcg-1*, *six3*, *otx2*, *gbx2*, and *hoxd1* in *bmp4*-injected  
397 embryos that were subjected to Smad6 treatment at different stages.

398

399 **Fig 3. The expression of *six3*, *otx2*, *gbx2* and *hoxd1* at different stages in wild-type and**  
400 ***smad6*-injected embryos.** Embryos are vegetal views with dorsal to the top, *smad6* injected  
401 at 2-cell or 4-cell stage.

402

403 **Fig 4. Hypothesis for head patterning by BMP signalling.** A currently unknown, BMP-  
404 dependent timer is running during head patterning. The timer can be fixed by anti-BMP  
405 signals and regulate the expression of anterior genes: *xcg-1*, *six3*, *otx2*, *gbx2*, and *hoxd1*,  
406 resulting in the head being progressively patterned. Please note that the markers *six3* and  
407 *xcg1* are more ventrally placed than the rest. This is because the front end of the early A-P  
408 axis bends around ventrally to face backward like the handle of a walking stick (Durstun  
409 2015).

410

411

412

413

**Noggin  
Protein**

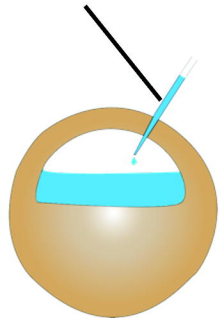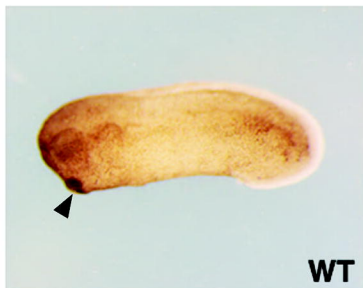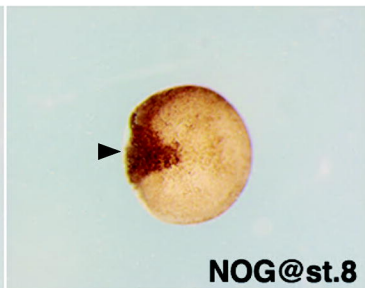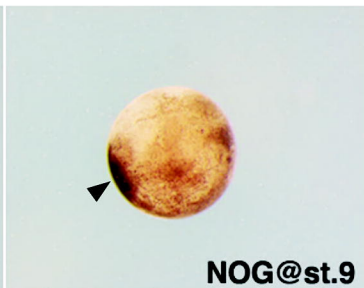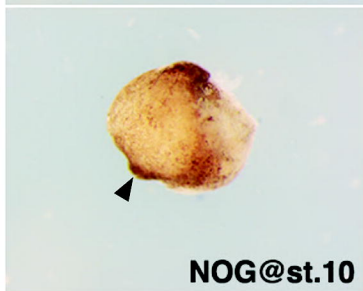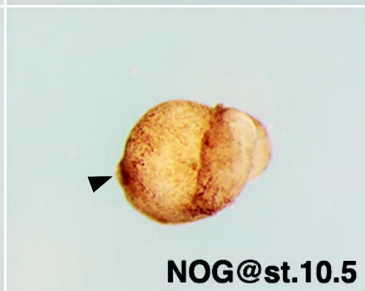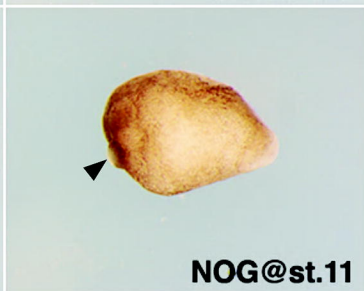

*Bmp4+smad6GR*  
DEX added @

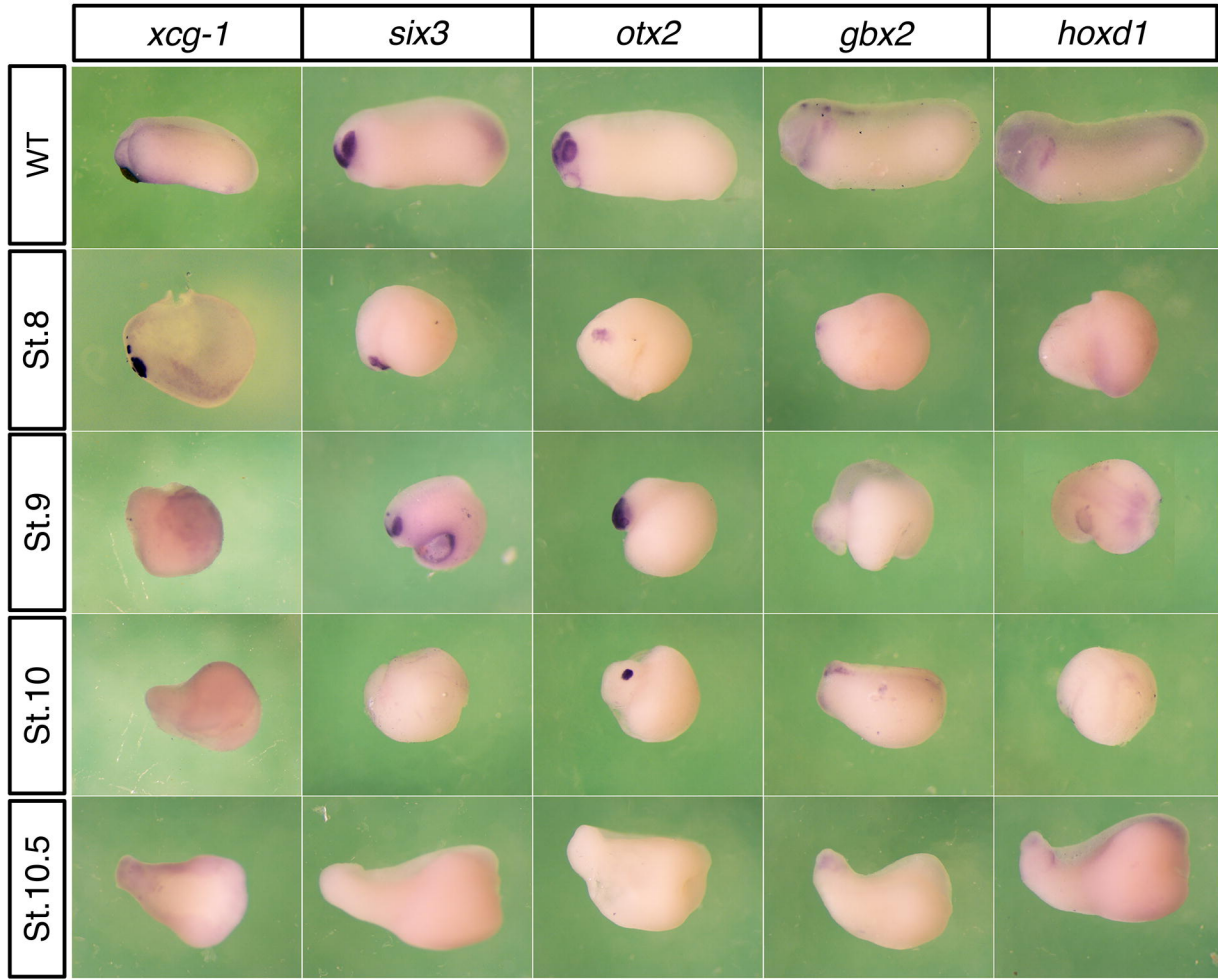

Wild type

*six3*

*otx2*

*gbx2*

*hoxd1*

st.8

st.9

st.10

st.10.5

st.11

st.11.5

st.12

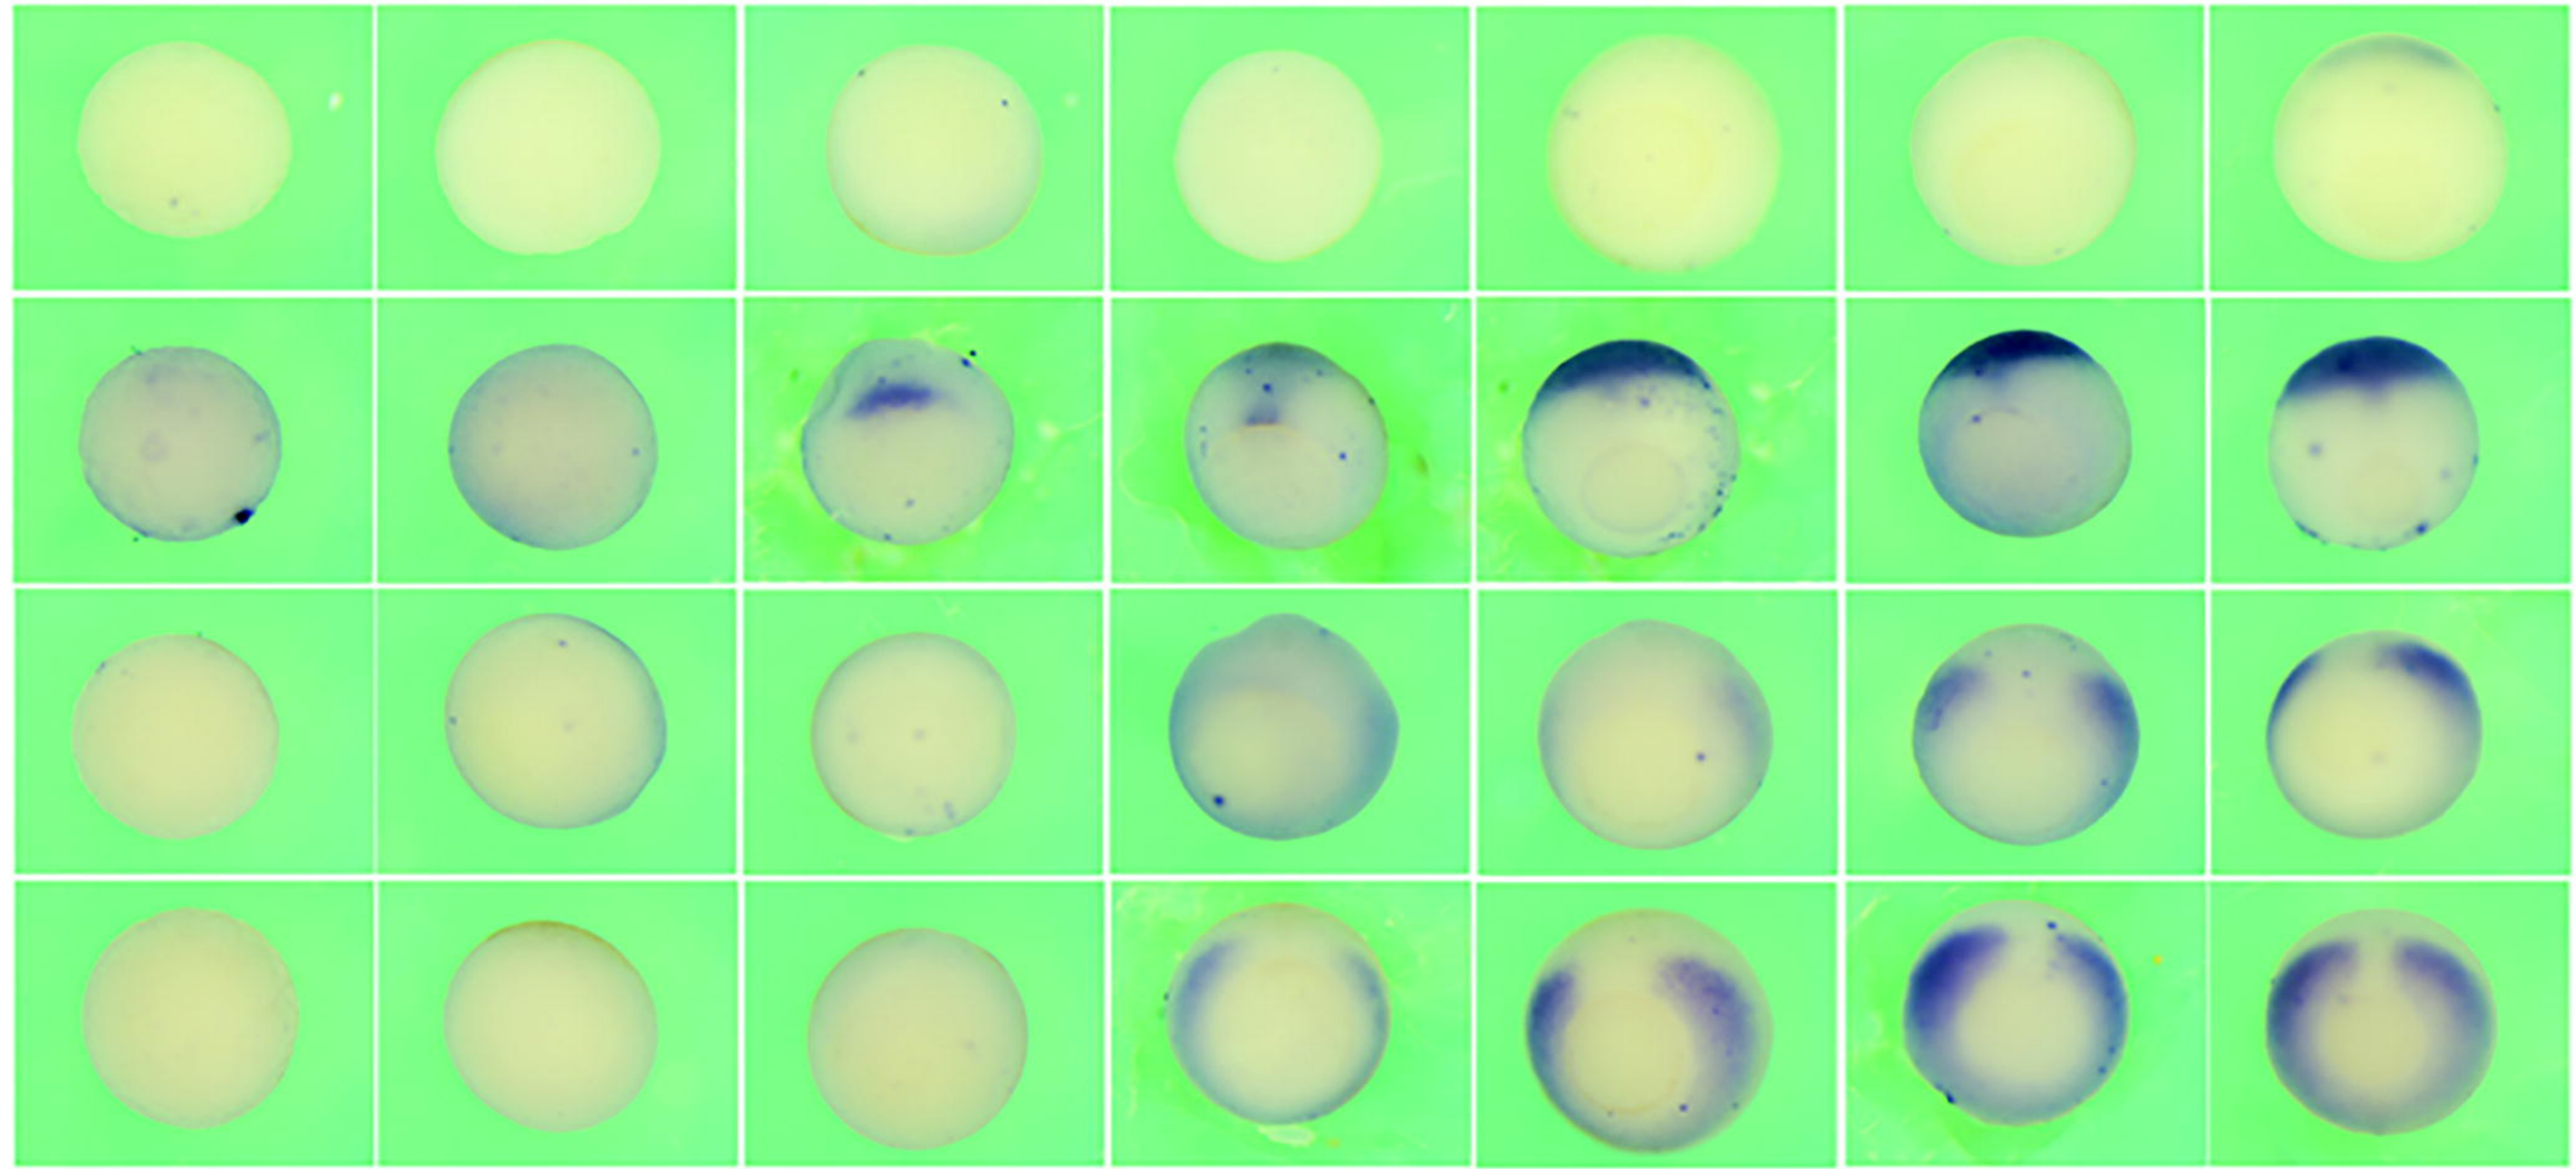

*smad6* injected

*six3*

*otx2*

*gbx2*

*hoxd1*

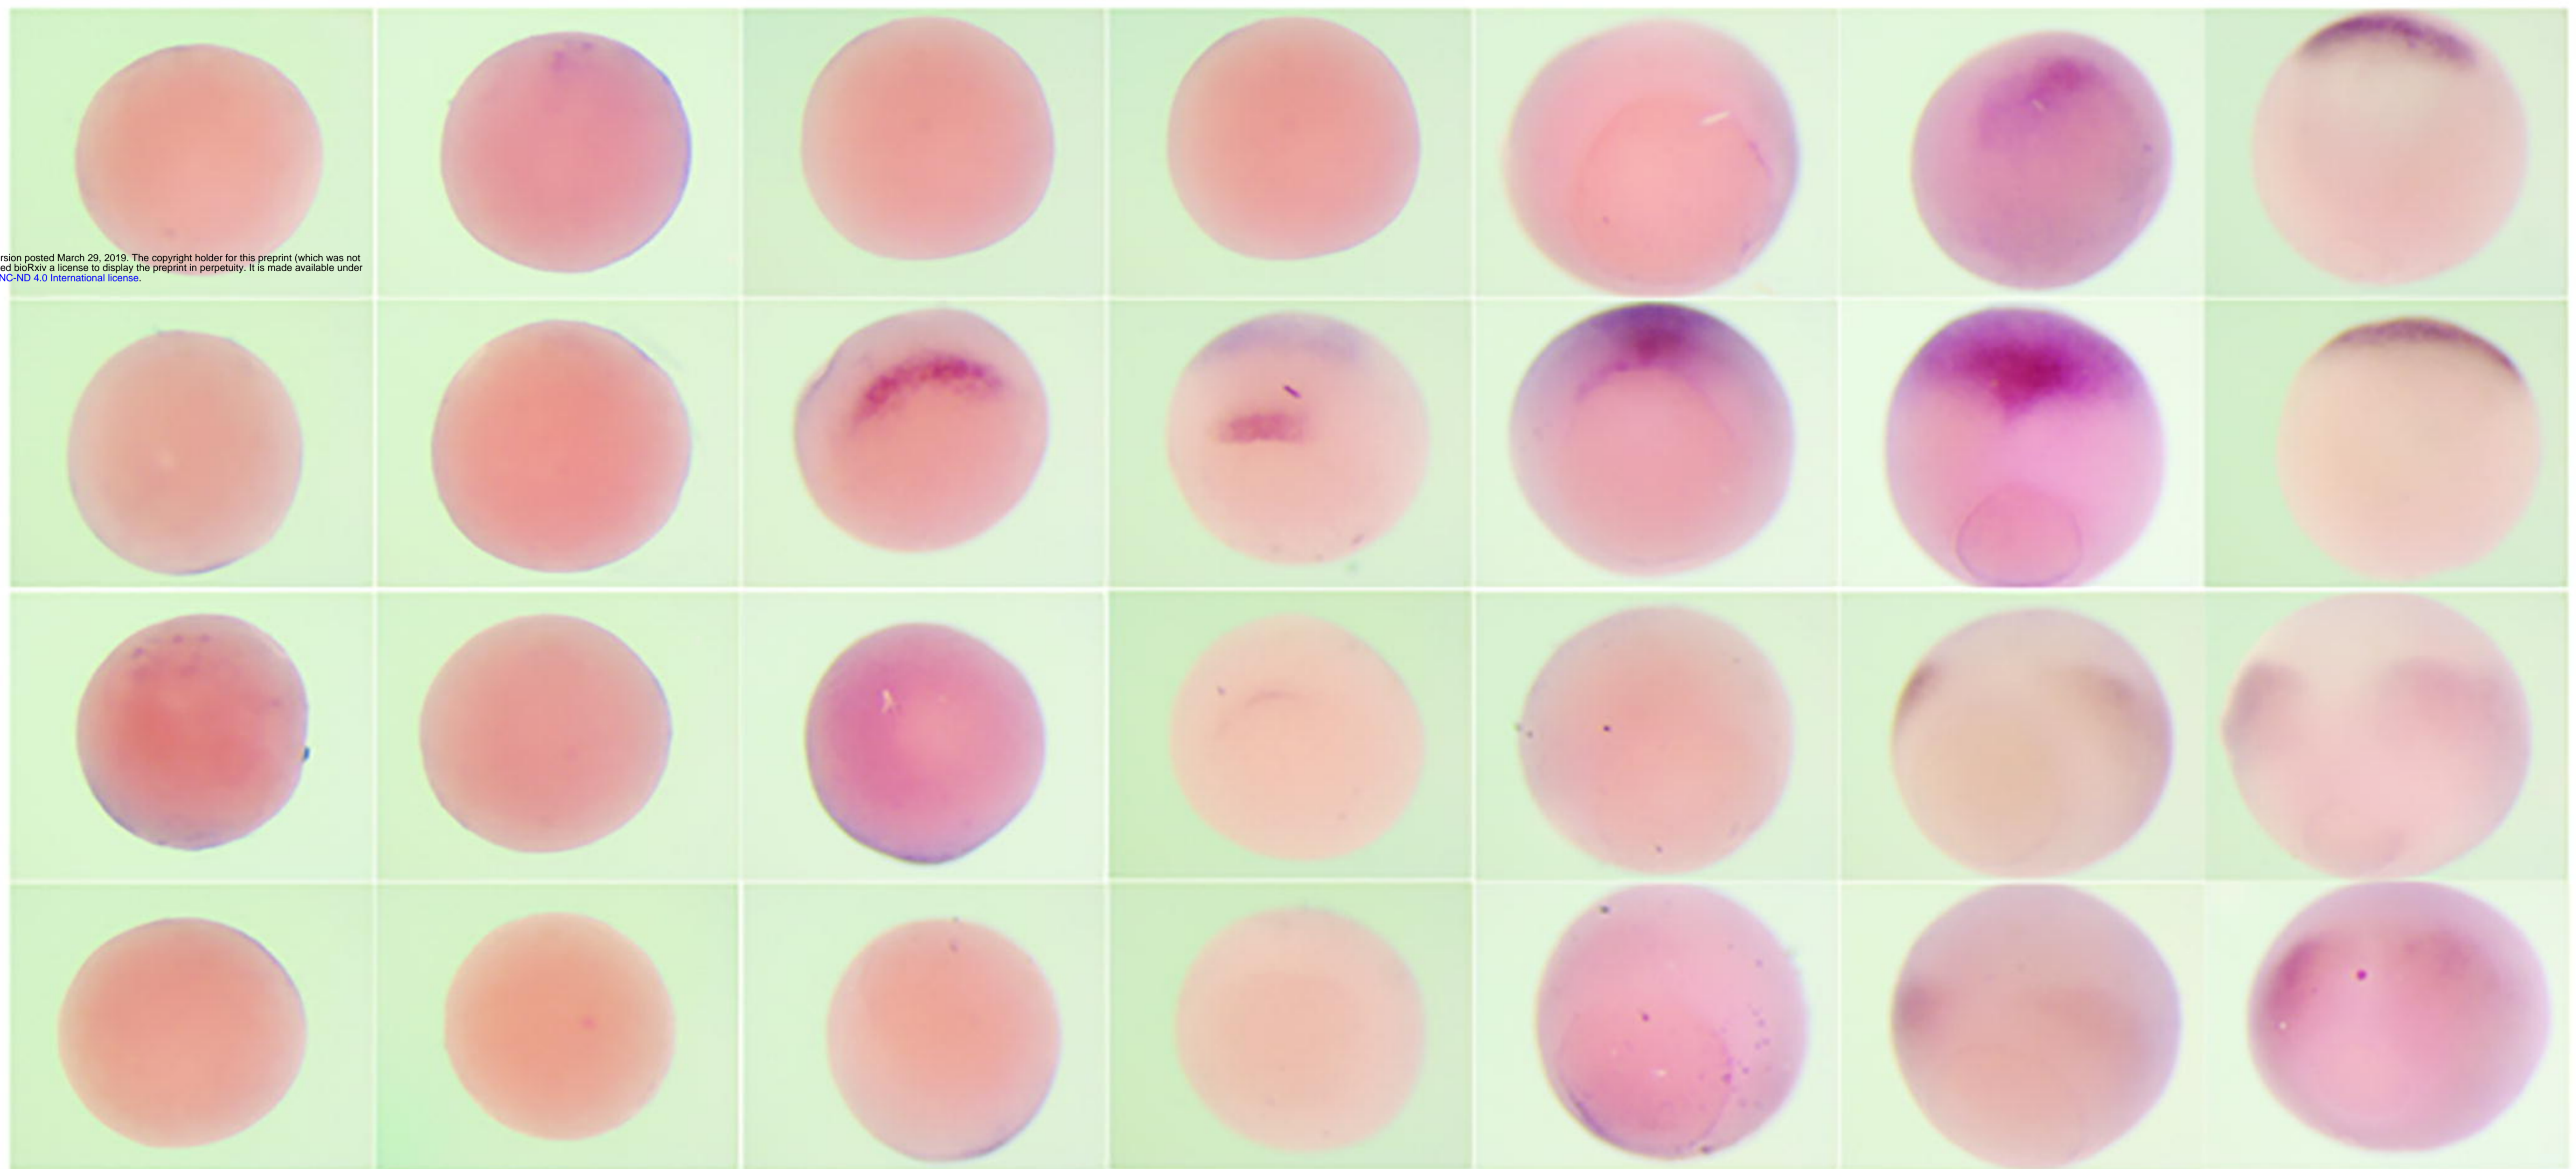

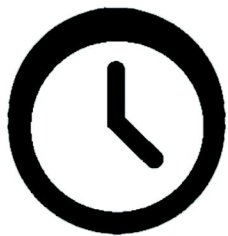

**BMP-dependent  
Timer**

**Stabilise**

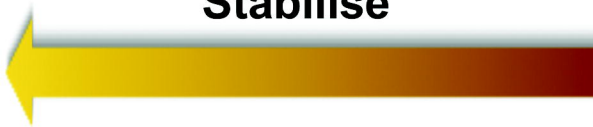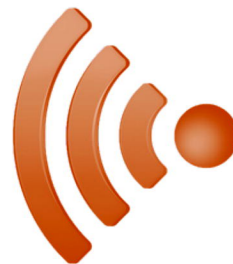

**Anti-BMP Signals**

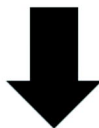

**A-P markers:**

*xcg-1*, *six3*,  
*otx2*, *gbx2*

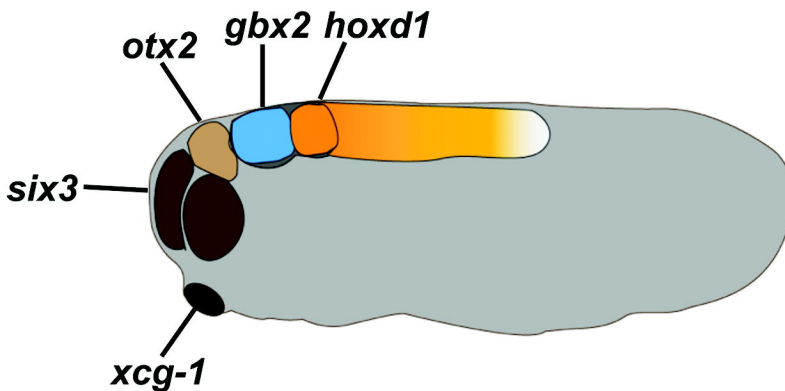

Source: https://www.biorxiv.org/content/10.1101/592451v1.full.pdf
